# Supplementary material
Source: publisher site journal article supplement (https://www.dovepress.com/article/502193)
Supplement: Supplementary file 1 [file get_supplementary_file.php]

***Supplementary Material***


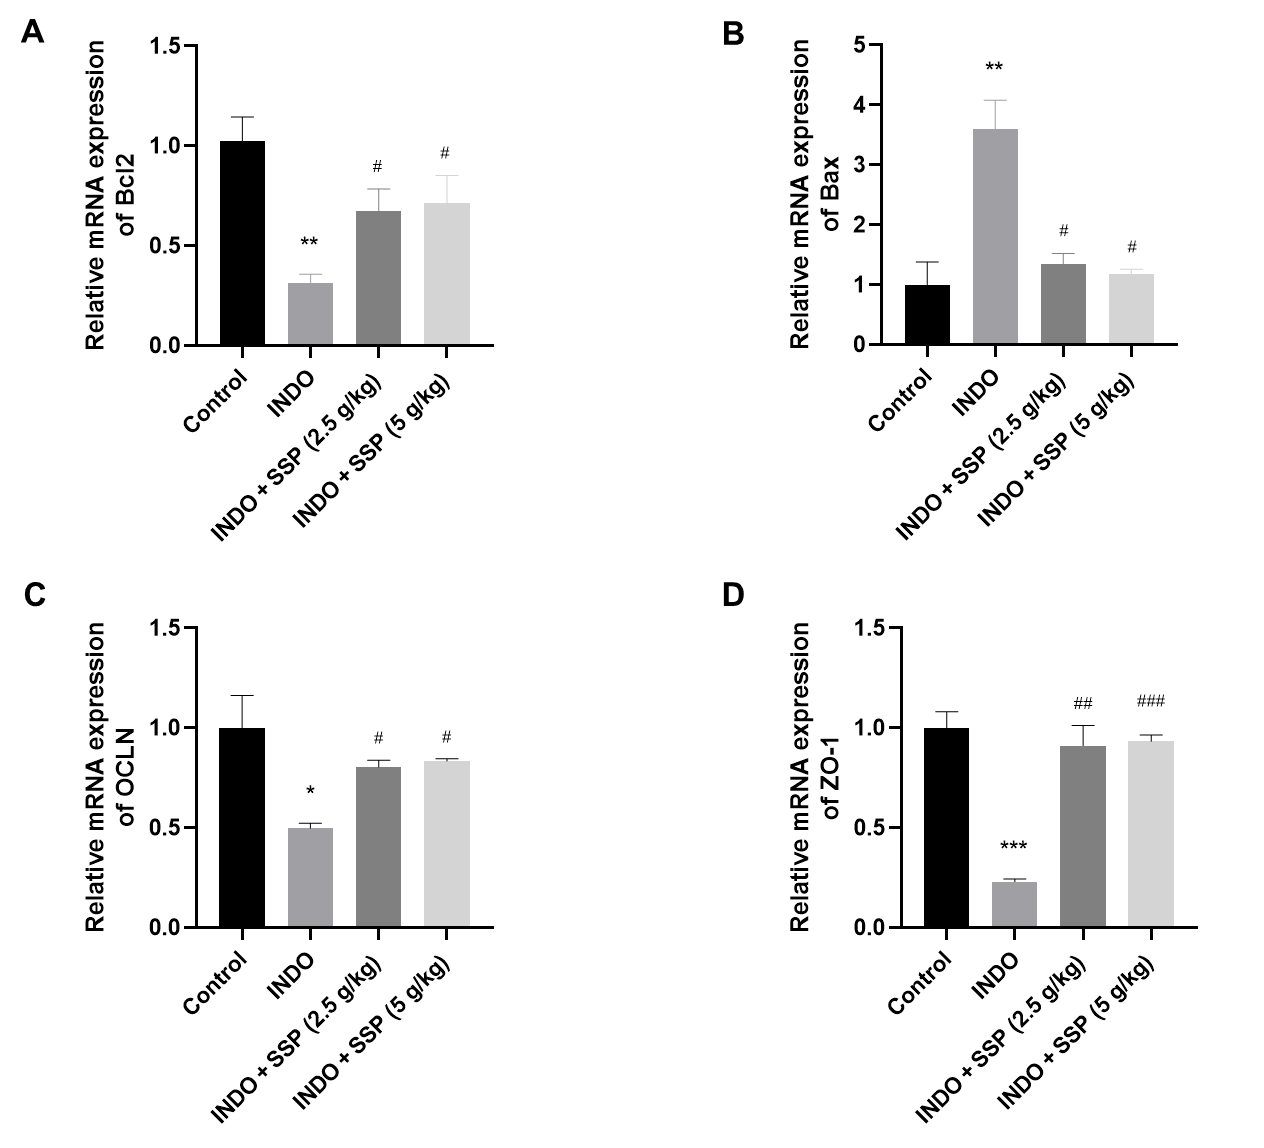


**Supplementary Figure 1.** Impacts of SSP on gene expression in rats with INDO-induced SIUs. (A) Effect of SSP on the mRNA expression of Bcl2. (B) Effect of SSP on the mRNA expression of Bax. (C) Effect of SSP on the mRNA expression of OCLN. (D) Effect of SSP on the mRNA expression of ZO-1. Results are displayed as means ± SEM. N= 5, *: P < 0.05, **: P < 0.01, ***: P < 0.001 when compared with the Control group; #: P < 0.05, ##: P < 0.01, ###: P < 0.001 when compared with the INDO group. INDO, indomethacin; OCLN, occludin.

**Supplementary Table 1** The 72 compounds were identified in SSP.

|  | Mol ID | Molecule Name | MW | OB (%)≥30 | DL≥0.18 | Quantitative Estimate of Drug-likeness |
| --- | --- | --- | --- | --- | --- | --- |
| Jujubae Fructus | MOL000096 | (-)-catechin | 290.29 | 49.67 | 0.24 |  |
| MOL000098 | quercetin | 302.25 | 46.43 | 0.27 |  |
| MOL000211 | Mairin | 456.78 | 55.37 | 0.77 |  |
| MOL000358 | beta-sitosterol | 414.79 | 36.91 | 0.75 |  |
| MOL000449 | Stigmasterol | 412.77 | 43.82 | 0.75 |  |
| MOL000492 | (+)-catechin | 290.29 | 54.82 | 0.24 |  |
| MOL000627 | Stepholidine | 327.41 | 33.1 | 0.54 |  |
| MOL000787 | Fumarine | 353.4 | 59.26 | 0.82 |  |
| MOL001454 | berberine | 336.39 | 36.86 | 0.77 |  |
| MOL001522 | (S)-Coclaurine | 285.37 | 42.35 | 0.23 |  |
| MOL002773 | beta-carotene | 536.96 | 37.18 | 0.58 |  |
| MOL004350 | Ruvoside_qt | 390.57 | 36.12 | 0.75 |  |
| MOL007213 | Nuciferin | 295.41 | 34.43 | 0.4 |  |
| MOL012921 | stepharine | 297.38 | 31.54 | 0.33 |  |
| MOL012946 | zizyphus saponin I_qt | 472.78 | 32.69 | 0.61 |  |
| MOL012976 | coumestrol | 268.23 | 32.48 | 0.33 |  |
| MOL012981 | Daechuine S7 | 514.74 | 44.81 | 0.82 |  |
| MOL012986 | Jujubasaponin V_qt | 472.78 | 36.98 | 0.63 |  |
| MOL012992 | Mauritine D | 342.46 | 89.12 | 0.45 |  |
| Myristica fragrans Houtt. | MOL000358 | beta-sitosterol | 414.79 | 36.91 | 0.75 |  |
| MOL009243 | Isoguaiacin | 328.44 | 48.78 | 0.31 |  |
| MOL009254 | galbacin | 340.4 | 60.99 | 0.53 |  |
| MOL009255 | 5-[(2S,3S)-7-methoxy-3-methyl-5-[(E)-prop-1-enyl]-2,3-dihydrobenzofuran-2-yl]-1,3-benzodioxole | 324.4 | 53.11 | 0.4 |  |
| MOL009259 | Kudos | 391.31 | 45.05 | 0.37 |  |
| MOL009263 | saucernetindiol | 344.44 | 41.85 | 0.32 |  |
| MOL009264 | tetrahydrofuroguaiacin B | 344.44 | 62.85 | 0.32 |  |
| MOL009265 | threo-austrobailignan-5 | 326.42 | 49.48 | 0.31 |  |
| Schisandrae Chinensis Fructus | MOL004624 | Longikaurin A | 348.48 | 47.72 | 0.53 |  |
| MOL005317 | Deoxyharringtonine | 515.66 | 39.27 | 0.81 |  |
| MOL008956 | Angeloylgomisin O | 498.62 | 31.96 | 0.84 |  |
| MOL008957 | Schizandrer B | 514.62 | 30.7 | 0.82 |  |
| MOL008968 | Gomisin-A | 416.51 | 30.69 | 0.77 |  |
| MOL008974 | Gomisin G | 508.61 | 32.67 | 0.82 |  |
| MOL008978 | Gomisin R | 400.46 | 34.84 | 0.85 |  |
| MOL008992 | Wuweizisu C | 384.46 | 46.26 | 0.84 |  |
| MOL009199 | Interiotherin B | 498.57 | 31.76 | 0.76 |  |
| MOL009213 | kadsulignan B | 474.55 | 30.63 | 0.84 |  |
| MOL009219 | neokadsuranic acid C | 456.73 | 35.4 | 0.85 |  |
| MOL009220 | neokadsuranin | 414.49 | 33.35 | 0.87 |  |
| MOL009235 | angusifolin B | 562.61 | 34.82 | 0.55 |  |
| Evodiae Fructus | MOL001454 | berberine | 336.39 | 36.86 | 0.77 |  |
| MOL002662 | rutaecarpine | 287.34 | 40.3 | 0.59 |  |
| MOL000354 | isorhamnetin | 316.28 | 49.6 | 0.3 |  |
| MOL000358 | beta-sitosterol | 414.79 | 36.91 | 0.75 |  |
| MOL000359 | sitosterol | 414.79 | 36.91 | 0.75 |  |
| MOL003943 | Rutalinidine | 275.33 | 40.89 | 0.22 |  |
| MOL003947 | 1-methyl-2-[(Z)-pentadec-10-enyl]-4-quinolone | 367.63 | 48.44 | 0.46 |  |
| MOL003956 | dihydrorutaecarpine | 289.36 | 42.26 | 0.59 |  |
| MOL003957 | 1-methyl-2-pentadecyl-4-quinolone | 369.65 | 44.51 | 0.45 |  |
| MOL003958 | Evodiamine | 303.39 | 86.01 | 0.64 |  |
| MOL003960 | 1-(5,7,8-trimethoxy-2,2-dimethylchromen-6-yl)ethanone | 292.36 | 30.38 | 0.18 |  |
| MOL003963 | hydroxyevodiamine | 319.39 | 72.1 | 0.7 |  |
| MOL003964 | 1-methyl-2-undecyl-4-quinolone | 313.53 | 47.59 | 0.27 |  |
| MOL003972 | 1-methyl-2-nonyl-4-quinolone | 285.47 | 48.41 | 0.2 |  |
| MOL003974 | Evocarpine | 339.57 | 48.66 | 0.36 |  |
| MOL003994 | 24-methyl-31-norlanost-9(11)-enol | 428.82 | 37.99 | 0.75 |  |
| MOL004004 | 6-OH-Luteolin | 302.25 | 46.93 | 0.27 |  |
| MOL004014 | Evodiamide | 307.43 | 73.77 | 0.28 |  |
| MOL004018 | Goshuyuamide I | 305.41 | 83.18 | 0.38 |  |
| MOL004019 | GoshuyuamideII | 319.39 | 69.1 | 0.43 |  |
| MOL004020 | gossypetin | 318.25 | 35 | 0.3 |  |
| MOL004021 | Gravacridoneshlirine | 359.83 | 63.73 | 0.53 |  |
| MOL004025 | N-(2-Methylaminobenzoyl)tryptamine | 293.4 | 56.95 | 0.26 |  |
| MOL000098 | quercetin | 302.25 | 46.43 | 0.27 |  |
| Zingiber officinale Rosc. | MOL000358 | beta-sitosterol | 414.79 | 36.91 | 0.75 |  |
| MOL006129 | 6-methylgingediacetate2 | 394.56 | 48.73 | 0.32 |  |
| MOL000449 | Stigmasterol | 412.77 | 43.82 | 0.75 |  |
| MOL001771 | poriferast-5-en-3beta-ol | 414.79 | 36.91 | 0.75 |  |
| Psoralea corylifoliaL. |  | chromenoflavanone |  |  |  | 0.851 |
|  | Bavachinin |  |  |  | 0.827 |
|  | Bavachin |  |  |  | 0.826 |
|  | corylinal methyl ether |  |  |  | 0.752 |

Abbreviations: OB, oral bioavailability; DL, drug-likeness

**Supplementary Table 2** GO Enrichment Analysis of SSP for SIUs Treatment (TOP 20)

| **GOterm** | **subgroup** | GeneRatio |
| --- | --- | --- |
| positive regulation of transcription by RNA polymerase II | Biological process | 0.31 |
| positive regulation of DNA-templated transcription | Biological process | 0.23 |
| positive regulation of gene expression | Biological process | 0.21 |
| signal transduction | Biological process | 0.21 |
| negative regulation of apoptotic process | Biological process | 0.19 |
| apoptotic process | Biological process | 0.18 |
| regulation of transcription by RNA polymerase II | Biological process | 0.17 |
| negative regulation of transcription by RNA polymerase II | Biological process | 0.17 |
| positive regulation of cell population proliferation | Biological process | 0.15 |
| response to xenobiotic stimulus | Biological process | 0.15 |
| inflammatory response | Biological process | 0.14 |
| phosphorylation | Biological process | 0.12 |
| positive regulation of apoptotic process | Biological process | 0.11 |
| proteolysis | Biological process | 0.11 |
| negative regulation of DNA-templated transcription | Biological process | 0.11 |
| response to lipopolysaccharide | Biological process | 0.11 |
| response to hypoxia | Biological process | 0.11 |
| negative regulation of gene expression | Biological process | 0.11 |
| protein phosphorylation | Biological process | 0.11 |
| negative regulation of cell population proliferation | Biological process | 0.11 |
| nucleus | Cellular component | 0.52 |
| cytoplasm | Cellular component | 0.50 |
| cytosol | Cellular component | 0.49 |
| plasma membrane | Cellular component | 0.41 |
| nucleoplasm | Cellular component | 0.40 |
| membrane | Cellular component | 0.34 |
| extracellular space | Cellular component | 0.31 |
| extracellular region | Cellular component | 0.28 |
| extracellular exosome | Cellular component | 0.22 |
| protein-containing complex | Cellular component | 0.19 |
| chromatin | Cellular component | 0.178808 |
| mitochondrion | Cellular component | 0.178808 |
| perinuclear region of cytoplasm | Cellular component | 0.145695 |
| endoplasmic reticulum | Cellular component | 0.145695 |
| cell surface | Cellular component | 0.13245 |
| endoplasmic reticulum membrane | Cellular component | 0.13245 |
| Golgi apparatus | Cellular component | 0.119205 |
| centrosome | Cellular component | 0.10596 |
| membrane raft | Cellular component | 0.092715 |
| endoplasmic reticulum lumen | Cellular component | 0.086093 |
| protein binding | Molecular function | 0.940397 |
| identical protein binding | Molecular function | 0.331126 |
| enzyme binding | Molecular function | 0.225166 |
| protein homodimerization activity | Molecular function | 0.198675 |
| metal ion binding | Molecular function | 0.192053 |
| RNA polymerase II cis-regulatory region sequence-specific DNA binding | Molecular function | 0.165563 |
| DNA-binding transcription factor activity, RNA polymerase II-specific | Molecular function | 0.165563 |
| zinc ion binding | Molecular function | 0.15894 |
| DNA binding | Molecular function | 0.15894 |
| ATP binding | Molecular function | 0.152318 |
| protein kinase binding | Molecular function | 0.145695 |
| ubiquitin protein ligase binding | Molecular function | 0.139073 |
| DNA-binding transcription factor activity | Molecular function | 0.13245 |
| DNA-binding transcription activator activity, RNA polymerase II-specific | Molecular function | 0.119205 |
| signaling receptor binding | Molecular function | 0.112583 |
| protein heterodimerization activity | Molecular function | 0.092715 |
| chromatin binding | Molecular function | 0.092715 |
| nuclear receptor activity | Molecular function | 0.086093 |
| heme binding | Molecular function | 0.086093 |
| RNA polymerase II-specific DNA-binding transcription factor binding | Molecular function | 0.086093 |

Abbreviations: SSP, SiShen Pill; SIUs, small intestinal ulcers

**Supplementary Table 3** KEGG Enrichment Analysis of SSP for SIUs Treatment (TOP 20)

| ID | Description | Count | P-Value | Genes |
| --- | --- | --- | --- | --- |
| hsa05200 | Pathways in cancer | 53 | 6.83E-28 | RB1/GSK3B/CDKN1A/CASP9/RASSF1/CASP8/CCND1/MYC/CASP3/AKT1/PRKACA/HSP90AA1/CHUK/IFNGR1/MMP1/MMP2/PRKCA/FOS/F2/MMP9/CCNA2/AR/BIRC5/PPARG/RAF1/PTGS2/HIF1A/EGFR/RELA/RXRA/ERBB2/E2F1/HMOX1/MAPK1/RUNX1T1/NQO1/JUN/GSTM1/NOS2/STAT1/IGF2/ESR1/ESR2/IL2/NFKBIA/IL4/IL6/CDK2/BCL2/BAX/CTNNB1/NFE2L2/BCL2L1 |
| hsa05417 | Lipid and atherosclerosis | 39 | 1.48E-29 | GSK3B/NCF1/RELA/ICAM1/CASP9/CASP8/CYP2B6/RXRA/CASP3/CCL2/AKT1/MAPK1/NLRP3/XBP1/JUN/HSP90AA1/VCAM1/HSPA5/CHUK/MMP1/NOS3/MMP3/PRKCA/FOS/MAPK14/SELE/MMP9/TNFRSF1A/NFKBIA/CYP2A6/IL6/CD40LG/IL1B/CYP1A1/BCL2/BAX/PPARG/BCL2L1/NFE2L2 |
| hsa05207 | Chemical carcinogenesis - receptor activation | 31 | 2.78E-20 | RB1/CHRNA7/AHR/ADRB2/CYP3A4/RELA/EGFR/CYP2B6/RXRA/CCND1/MYC/E2F1/CYP1B1/AKT1/MAPK1/CACNA1S/PRKACA/JUN/HSP90AA1/GSTM1/PRKCA/FOS/ESR1/ESR2/AR/CYP1A1/BCL2/BIRC5/PGR/RAF1/PPARA |
| hsa05418 | Fluid shear stress and atherosclerosis | 28 | 4.94E-22 | NCF1/PLAT/RELA/ICAM1/THBD/KDR/CCL2/AKT1/HMOX1/NQO1/JUN/HSP90AA1/GSTM1/VCAM1/CHUK/NOS3/CAV1/MMP2/FOS/MAPK14/SELE/MMP9/TNFRSF1A/IL1A/IL1B/BCL2/CTNNB1/NFE2L2 |
| hsa05167 | Kaposi sarcoma-associated herpesvirus infection | 27 | 4.35E-17 | RB1/GSK3B/CDKN1A/PTGS2/HIF1A/RELA/ICAM1/CASP9/CASP8/CCND1/MYC/CASP3/E2F1/AKT1/MAPK1/JUN/CHUK/IFNGR1/STAT1/FOS/MAPK14/TNFRSF1A/NFKBIA/IL6/BAX/CTNNB1/RAF1 |
| hsa05163 | Human cytomegalovirus infection | 27 | 1.71E-15 | RB1/GSK3B/CDKN1A/PTGS2/RELA/EGFR/CASP9/CASP8/CCND1/MYC/CASP3/E2F1/CCL2/AKT1/MAPK1/PRKACA/CHUK/IL10RB/PRKCA/MAPK14/TNFRSF1A/NFKBIA/IL6/IL1B/BAX/CTNNB1/RAF1 |
| hsa04151 | PI3K-Akt signaling pathway | 27 | 1.02E-10 | GSK3B/CDKN1A/RELA/EGFR/CASP9/RXRA/ERBB3/CCND1/MYC/ERBB2/KDR/SPP1/AKT1/MAPK1/MCL1/HSP90AA1/CHUK/NOS3/IGF2/PRKCA/IL2/IL4/IL6/CDK2/BCL2/RAF1/BCL2L1 |
| hsa05022 | Pathways of neurodegeneration - multiple diseases | 27 | 4.66E-08 | APP/CHRM3/GSK3B/CHRNA7/PTGS2/SLC6A3/RELA/CASP9/CASP8/CASP3/MAPK1/CACNA1S/XBP1/NOS2/HSPA5/PRKCA/MAPK14/TNFRSF1A/SOD1/IL1A/IL6/IL1B/BCL2/BAX/CTNNB1/RAF1/BCL2L1 |
| hsa05161 | Hepatitis B | 25 | 6.88E-17 | RB1/CDKN1A/RELA/CASP9/CASP8/MYC/CASP3/E2F1/AKT1/MAPK1/JUN/CHUK/STAT1/PRKCA/FOS/MAPK14/MMP9/NFKBIA/CCNA2/IL6/CDK2/BCL2/BAX/BIRC5/RAF1 |
| hsa04933 | AGE-RAGE signaling pathway in diabetic complications | 24 | 1.11E-20 | JUN/VCAM1/NOS3/STAT1/MMP2/SERPINE1/PRKCA/MAPK14/SELE/F3/RELA/ICAM1/IL1A/THBD/COL3A1/IL6/CCND1/IL1B/CASP3/BCL2/BAX/CCL2/AKT1/MAPK1 |
| hsa05160 | Hepatitis C | 24 | 4.81E-16 | RB1/GSK3B/CDKN1A/CHUK/STAT1/EGFR/RELA/TNFRSF1A/CASP9/NFKBIA/CXCL10/CASP8/RXRA/CCND1/MYC/CASP3/CDK2/E2F1/BAX/AKT1/MAPK1/CTNNB1/RAF1/PPARA |
| hsa04010 | MAPK signaling pathway | 24 | 3.91E-10 | JUN/CHUK/IGF2/HSPB1/PRKCA/FOS/MAPK14/EGFR/RELA/CACNA1G/TNFRSF1A/IL1A/ERBB3/MYC/RASA1/IL1B/CASP3/ERBB2/KDR/AKT1/MAPK1/CACNA1S/RAF1/PRKACA |
| hsa05215 | Prostate cancer | 23 | 1.14E-19 | RB1/GSK3B/CDKN1A/HSP90AA1/CHUK/MMP3/PLAT/MMP9/EGFR/RELA/CASP9/NFKBIA/AR/CCND1/PLAU/ERBB2/CDK2/E2F1/BCL2/AKT1/MAPK1/CTNNB1/RAF1 |
| hsa05166 | Human T-cell leukemia virus 1 infection | 23 | 7.10E-12 | RB1/CDKN1A/JUN/CHUK/FOS/IL2/RELA/ICAM1/TNFRSF1A/NFKBIA/CCNA2/IL6/CCND1/CHEK2/MYC/CHEK1/CDK2/E2F1/BAX/AKT1/MAPK1/PRKACA/BCL2L1 |
| hsa05165 | Human papillomavirus infection | 23 | 1.57E-08 | RB1/GSK3B/CDKN1A/CHUK/STAT1/PTGS2/EGFR/RELA/TNFRSF1A/CCNA2/CASP8/CCND1/CASP3/IRF1/CDK2/SPP1/E2F1/BAX/AKT1/MAPK1/CTNNB1/RAF1/PRKACA |
| hsa04668 | TNF signaling pathway | 22 | 1.56E-16 | JUN/VCAM1/CHUK/MMP3/FOS/PTGS2/MAPK14/SELE/MMP9/RELA/ICAM1/TNFRSF1A/NFKBIA/CXCL10/IL6/CASP8/IL1B/CASP3/IRF1/CCL2/AKT1/MAPK1 |
| hsa05164 | Influenza A | 22 | 3.42E-13 | PRSS1/CHUK/IFNGR1/STAT1/PRKCA/RELA/ICAM1/TNFRSF1A/CASP9/NFKBIA/IL1A/CXCL10/IL6/CASP8/IL1B/CASP3/BAX/CCL2/AKT1/NLRP3/MAPK1/RAF1 |
| hsa05169 | Epstein-Barr virus infection | 22 | 8.95E-12 | RB1/CDKN1A/JUN/CHUK/STAT1/MAPK14/RELA/ICAM1/CASP9/NFKBIA/CCNA2/CXCL10/IL6/CASP8/CCND1/MYC/CASP3/CDK2/E2F1/BCL2/BAX/AKT1 |
| hsa05205 | Proteoglycans in cancer | 22 | 9.84E-12 | CDKN1A/CAV1/MMP2/IGF2/PRKCA/MAPK14/HIF1A/ESR1/MMP9/EGFR/ERBB3/CCND1/PLAU/MYC/CASP3/ERBB2/KDR/AKT1/MAPK1/CTNNB1/RAF1/PRKACA |
| hsa05208 | Chemical carcinogenesis - reactive oxygen species | 21 | 4.97E-10 | NQO1/PTPN1/JUN/GSTM1/NCF1/CHUK/AHR/FOS/MAPK14/HIF1A/EGFR/RELA/SOD1/NFKBIA/CYP1A1/CYP1B1/AKT1/HMOX1/MAPK1/RAF1/NFE2L2 |

Abbreviations: SSP, SiShen Pill; SIUs, small intestinal ulcers
